# Supplementary material for: Pathogen invasion history elucidates contemporary host pathogen dynamics
Source: PubMed Central journal article supplement (PMC6752790; doi:10.1371/journal.pone.0219981), 2019-09-19
Supplement: pone.0219981.s001.pdf [file pone.0219981.s001.pdf]

| Species                   | 1900     | 1910       | 1920      | 1930      | 1940      | 1950       | 1960       | 1970       | 1980       | 1990       | 2000       | Total       |
|---------------------------|----------|------------|-----------|-----------|-----------|------------|------------|------------|------------|------------|------------|-------------|
| <i>Bufo boreas</i>        |          |            |           |           |           | 1          | 2          | 17         | 12         | 6          | 13         | 51          |
| <i>Bufo sp.</i>           |          |            |           |           |           |            |            | 7          |            |            |            | 7           |
| <i>Bufo canorus</i>       |          |            |           |           |           |            |            |            | 1          |            | 1          | 2           |
| <i>Pseudacris regilla</i> |          |            |           |           |           | 35         | 44         | 31         | 60         | 61         | 102        | 333         |
| <i>Rana boylei</i>        |          | 10         |           |           |           | 55         | 11         | 14         |            | 8          | 4          | 102         |
| <i>Rana cascadae</i>      |          |            |           |           |           |            |            | 1          |            |            |            | 1           |
| <i>Rana catesbeiana</i>   |          |            |           |           |           | 1          | 1          | 2          | 5          | 25         | 14         | 48          |
| <i>Rana draytonii</i>     |          |            |           |           |           |            | 1          |            |            |            |            | 1           |
| <i>Rana muscosa</i>       |          | 51         | 1         | 11        | 5         | 26         | 58         | 8          |            | 15         | 2          | 177         |
| <i>Rana pipiens</i>       |          |            |           |           |           |            | 4          |            |            |            |            | 4           |
| <i>Rana sierrae</i>       | 1        | 61         | 11        | 58        | 28        | 118        | 63         | 70         | 23         |            | 5          | 438         |
| <b>Total</b>              | <b>1</b> | <b>122</b> | <b>12</b> | <b>69</b> | <b>33</b> | <b>236</b> | <b>184</b> | <b>150</b> | <b>101</b> | <b>115</b> | <b>141</b> | <b>1164</b> |

**Table S1.** The number of specimens of each host species sampled by time period
